# Supplementary material for: Design and synthesis of a rhodol isomer and its derivatives with high selectivity and sensitivity for sensing Hg2+and F−in aqueous media
Source: Royal Society of Chemistry journal article supplement (doi:10.1039/c6ra14287g), 2016-01-01
Supplement: c6ra14287g1.pdf [file c6ra14287g1.pdf]

## Design and Synthesis of a Rhodol Isomer and Its Derivatives with High Selectivity and Sensitivity for Sensing $\text{Hg}^{2+}$ and $\text{F}^-$ in Aqueous Media

Jun Qin, Huirong Yao, Song He and Xianshun Zeng

School of Materials Science & Engineering, Tianjin University of Technology, Tianjin 300384, China. Fax: (+86)22-60215226; Tel: (+86)22-60216748; E-mail: xshzeng@tjut.edu.cn

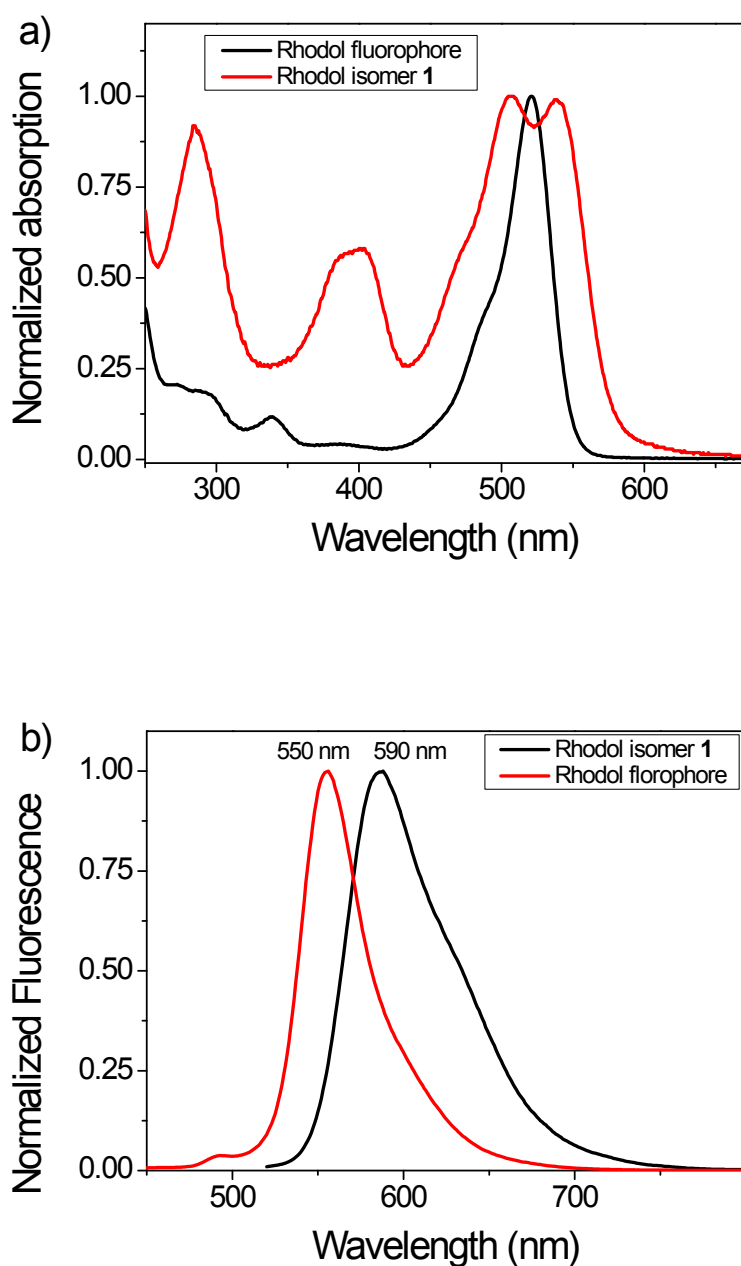

**Figure S1.** Absorption and fluorescence emission spectra of the rhodol fluorophore and the rhodol isomer 1 in water at pH 7. a) Absorption spectra of the rhodol fluorophore and the rhodol isomer 1,

b) Fluorescence emission spectra of the rhodol fluorophore and the rhodol isomer **1**.

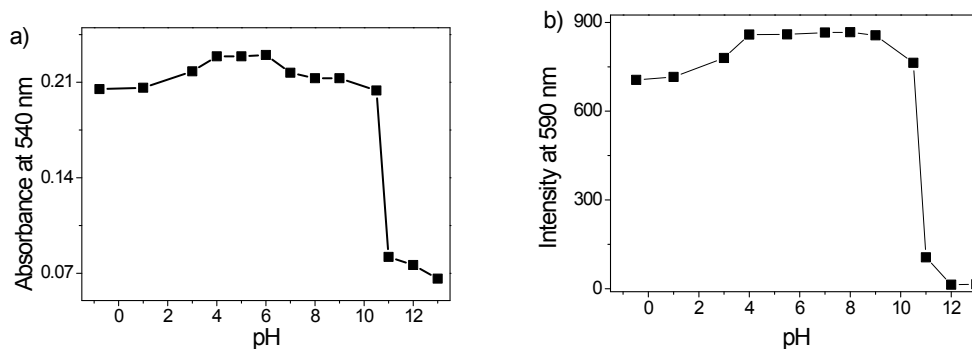

**Figure S2.** Absorption a) and fluorescence emission b) spectra of the rhodol isomer **1** under different pH conditions in water.

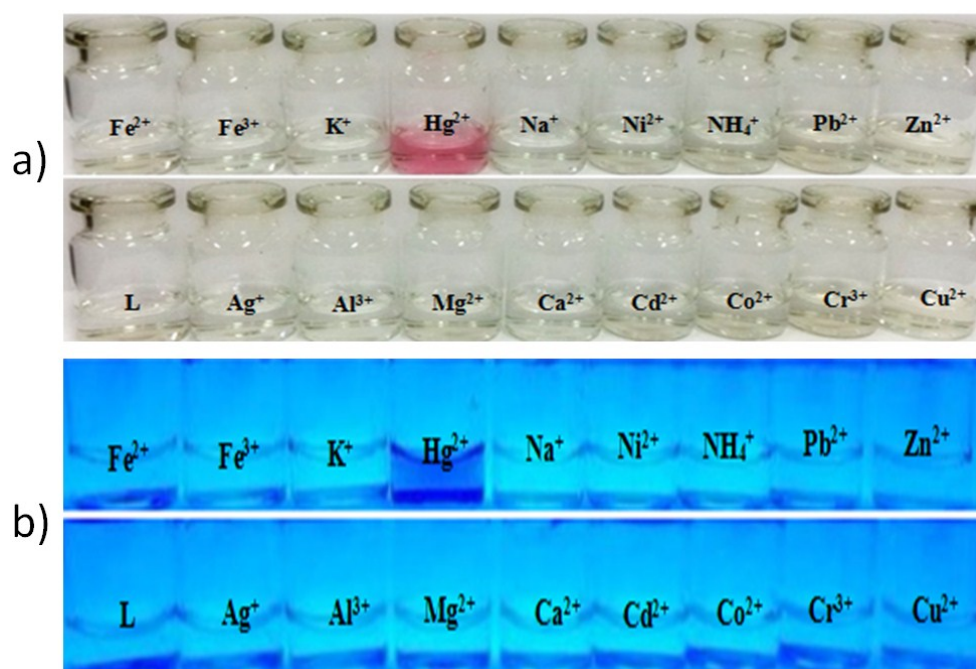

**Figure S3.** (a) Photograph of **2** in the presence of various metal ions. (b) fluorescence changes of **2** under UV 365 nm excitation in the presence of different metal ions.

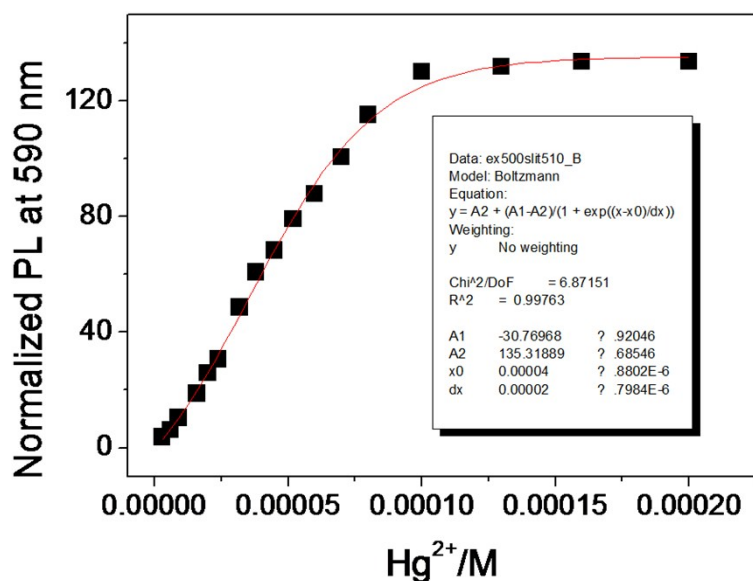

Figure S4. Measurement of the fluorescence turn-on constant ( $K_{turn-on}$ ) of **2**.<sup>S1</sup>

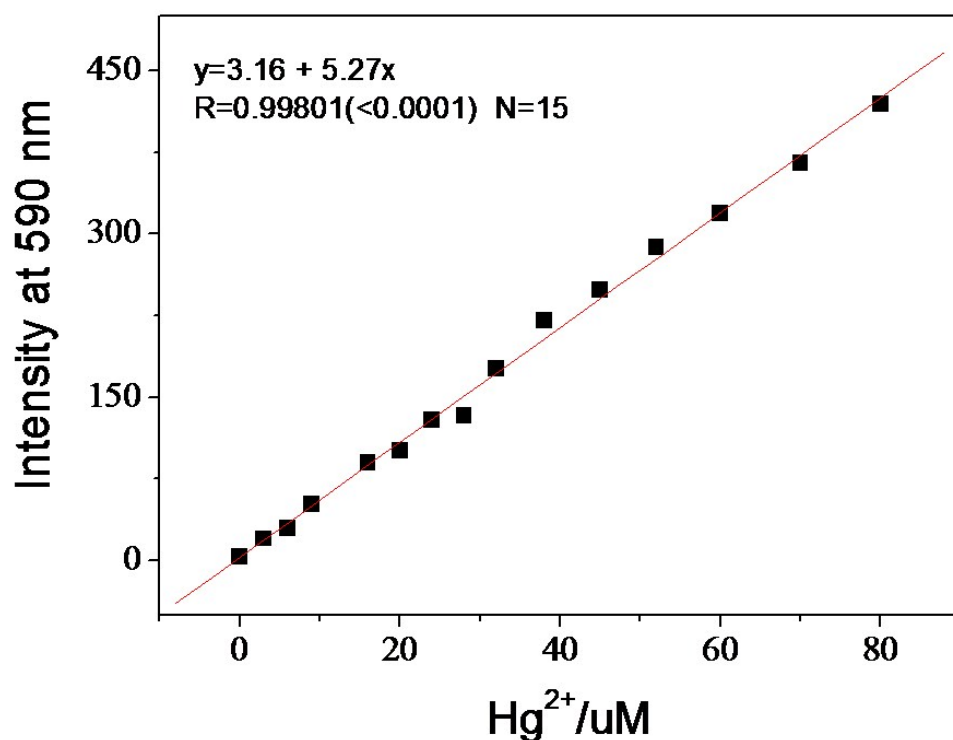

Figure S5 Emission (at 590 nm) of **2** (10  $\mu\text{M}$ ) at different concentrations of  $\text{Hg}^{2+}$  added. A linear relationship between the fluorescence intensity and the  $\text{Hg}^{2+}$  concentration could be obtained in the 0 - 80  $\mu\text{M}$  concentration range ( $R = 0.9980$ ). The detection limit was then calculated with the equation: detection limit =  $3\sigma_{bi}/m$ , where  $\sigma_{bi}$  is the standard deviation of blank measurements ( $\sigma_{bi} = 5.8197 \times 10^{-8}$ , derived from 20 measurements),  $m$  is the slope between intensity *versus* sample concentration. The detection limit was measured to be  $3.31 \times 10^{-9}$  M.

<sup>S1</sup> P. Du and S. J. Lippard, *Inorg. Chem.*, 2010, **49**, 10753.

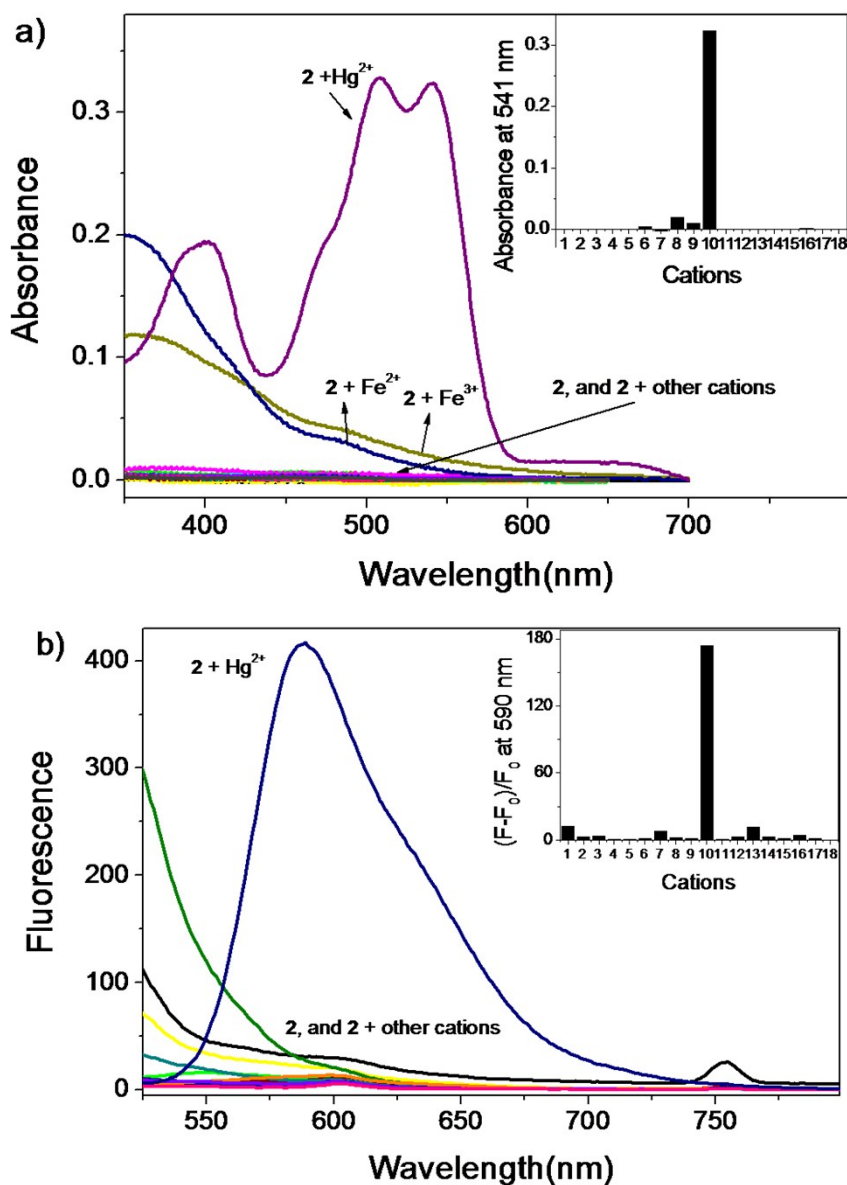

**Figure S6.** Absorption a) and Fluorescence b) spectra of **2** (10  $\mu\text{M}$ ) and those in the presence of different nitrate salts (10 equiv.). Insets of a) and b): (1) **2** +  $\text{Ag}^+$ ; (2) **2** +  $\text{Al}^{3+}$ ; (3) **2** +  $\text{Ca}^{2+}$ ; (4) **2** +  $\text{Cd}^{2+}$ ; (5) **2** +  $\text{Co}^{2+}$ ; (6) **2** +  $\text{Cr}^{3+}$ ; (7) **2** +  $\text{Cu}^{2+}$ ; (8) **2** +  $\text{Fe}^{2+}$ ; (9) **2** +  $\text{Fe}^{3+}$ ; (10) **2** +  $\text{Hg}^{2+}$ ; (11) **2** +  $\text{K}^+$ ; (12) **2** +  $\text{Mg}^{2+}$ ; (13) **2** +  $\text{Na}^+$ ; (14) **2** +  $\text{NH}_4^+$ ; (15) **2** +  $\text{Ni}^{2+}$ ; (16) **2** +  $\text{Pb}^{2+}$ ; (17) **2** +  $\text{Zn}^{2+}$  and (18) **2** alone.  $\lambda_{\text{ex}} = 500 \text{ nm}$ .

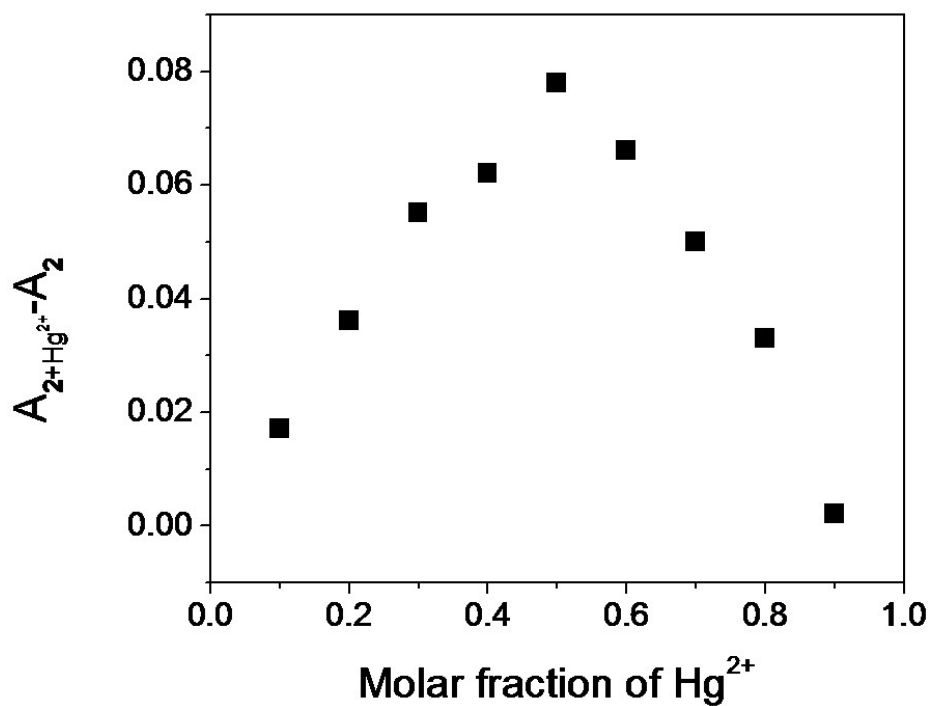

**Figure S7.** Job's plot of **2** showing the 1:1 stoichiometry of the complex between  $\text{Hg}^{2+}$  ion and **2**. The total of **2** and  $\text{Hg}^{2+}$  is 10  $\mu\text{M}$ .

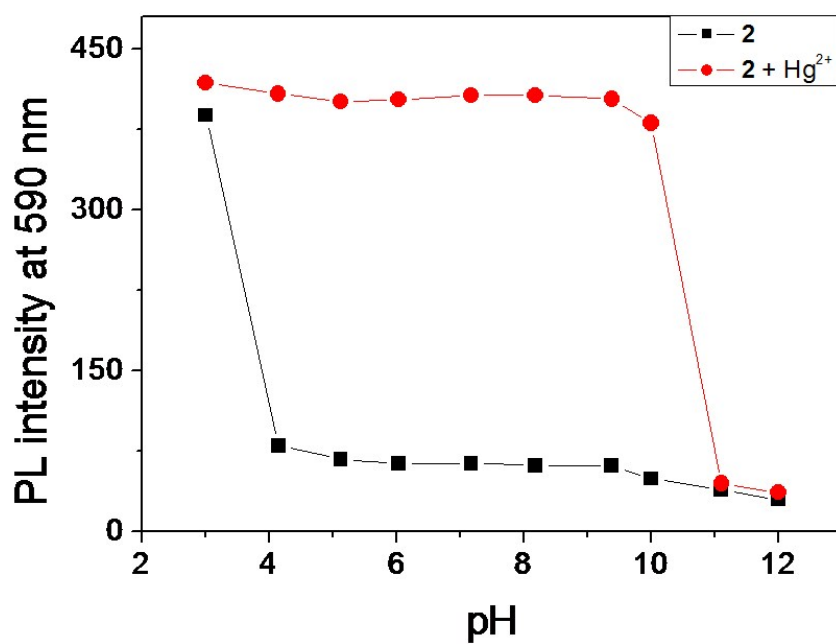

**Figure S8** Fluorescence response of **2** (10  $\mu\text{M}$ ) and **2** +  $\text{Hg}^{2+}$  (5.0 equiv) as a function of different pH values.

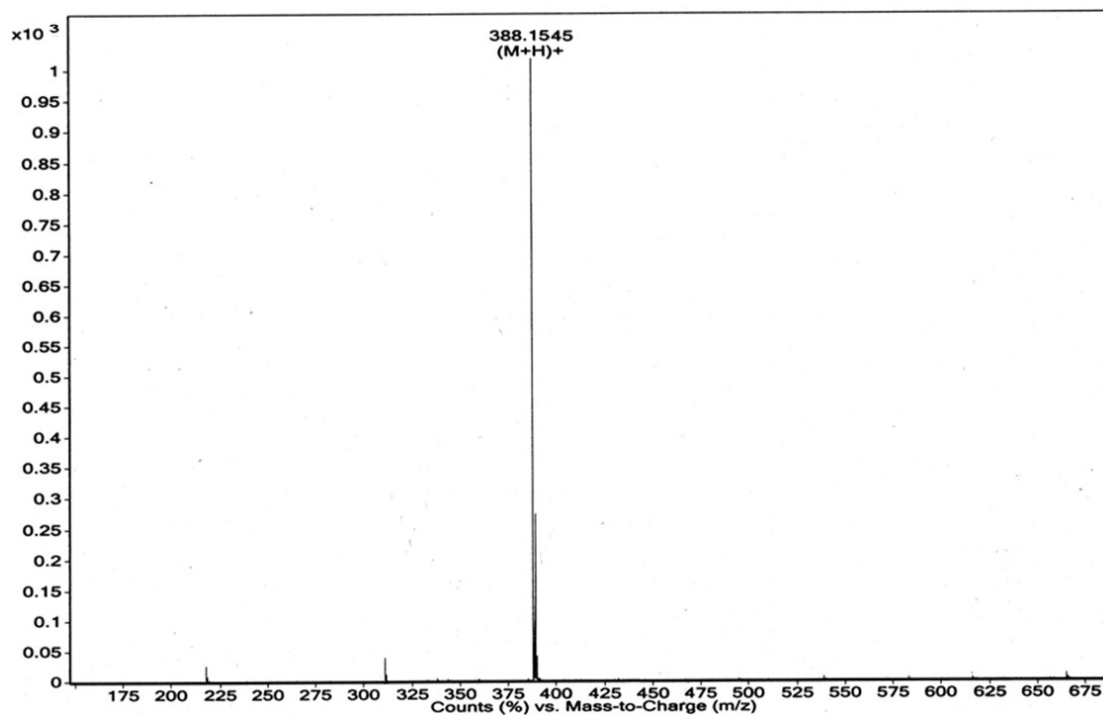

**Figure S9** HRMS spectra of **2** upon addition of  $\text{Hg}^{2+}$  (2.0 equiv.). The peak (m/z) at 388.1545 corresponds to rhodol isomer **1** +  $\text{H}^+$  (Calcd: 388.1543).

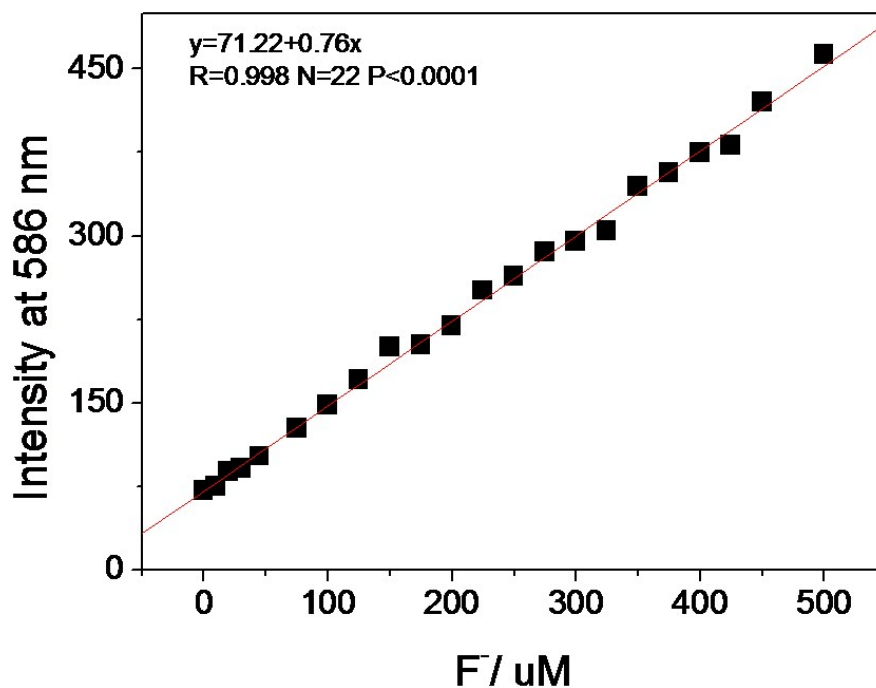

**Figure S10.** Emission at 586 nm of **3** (5  $\mu\text{M}$ ) at different concentrations of  $\text{F}^-$  added. A linear relationship between the fluorescence intensity and the  $\text{F}^-$  concentration could be obtained in the 0 - 500  $\mu\text{M}$  concentration range ( $R = 0.9980$ ). The detection limit was then calculated with the equation: detection limit =  $3\sigma_{bi}/m$ , where  $\sigma_{bi}$  is the standard deviation of blank measurements ( $\sigma_{bi} = 1.4225$ , derived from 10 measurements),  $m$  is the slope between intensity *versus* sample concentration. The detection limit was measured to be  $5.61 \times 10^{-6}$  M.

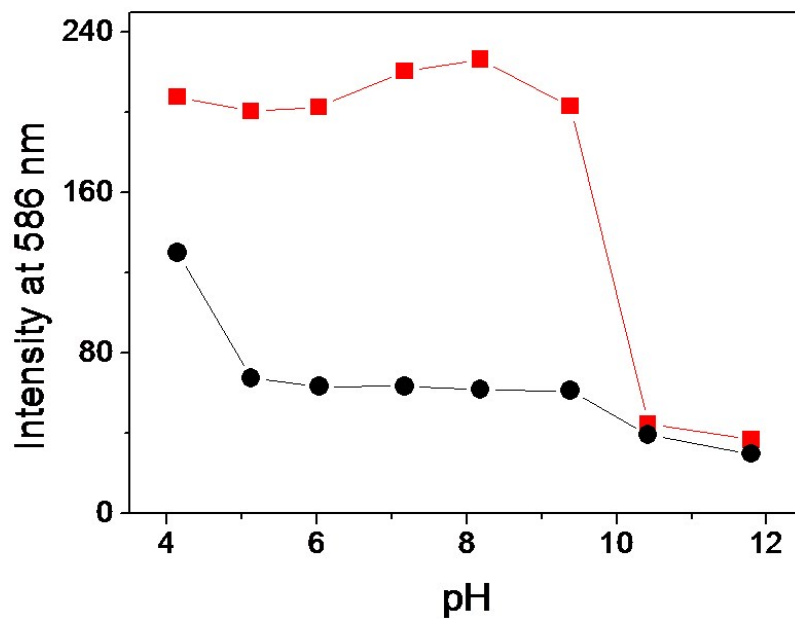

**Figure S11** Fluorescence response of **3** (5  $\mu$ M) (black dot) and after addition of  $F^-$  (40 eq.) (red dot) in DMSO–water (v/v = 1 : 1) as a function of different pH values.  $\lambda_{ex}$  = 514 nm.

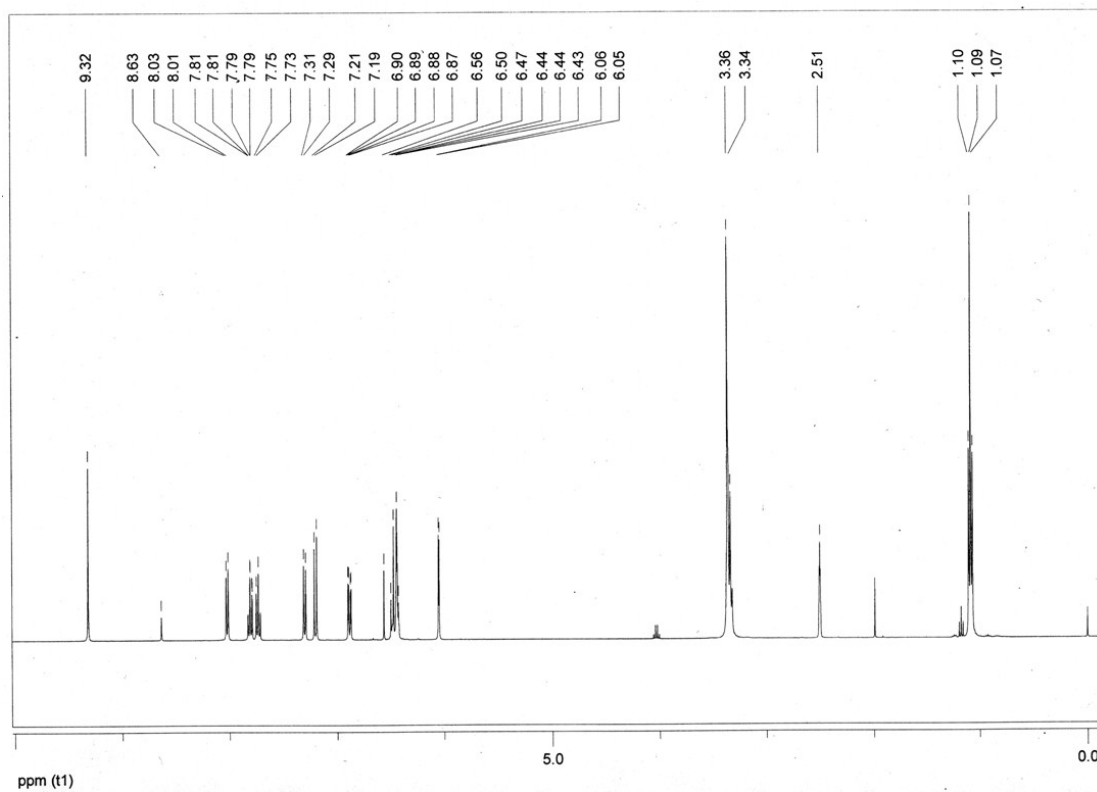

**Fig. S12.**  $^1H$  NMR of **1** (400 MHz, DMSO- $d_6$ )

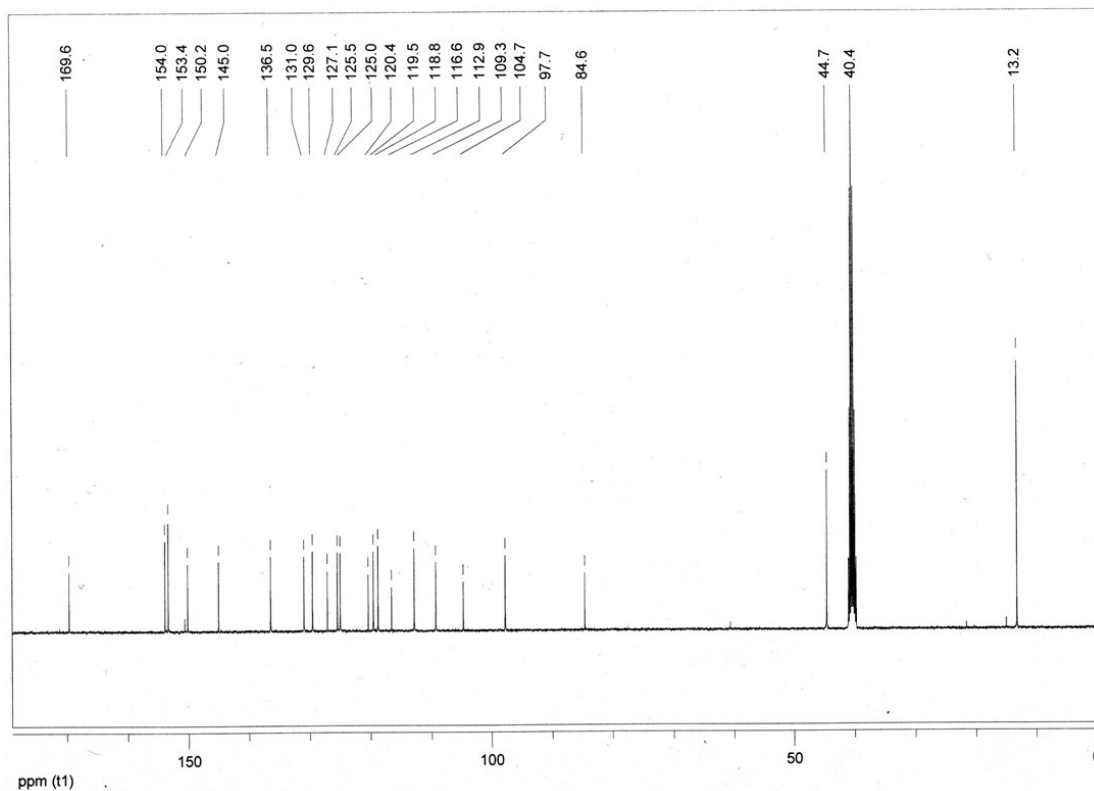

Fig. S13.  $^{13}\text{C}$  NMR of **1** (100 MHz,  $\text{DMSO-d}_6$ ).

| Sample Name   | lc/ms     | Position    | P1-A4     | Instrument Name | Instrument 1 | User Name              |                      |
|---------------|-----------|-------------|-----------|-----------------|--------------|------------------------|----------------------|
| Inj Vol       | 2         | InjPosition |           | SampleType      | Sample       | IRM Calibration Status | Some Ions Missed     |
| Data Filename | YHR0308.d | ACQ Method  | chen-ms.m | Comment         |              | Acquired Time          | 4/17/2014 3:36:07 PM |

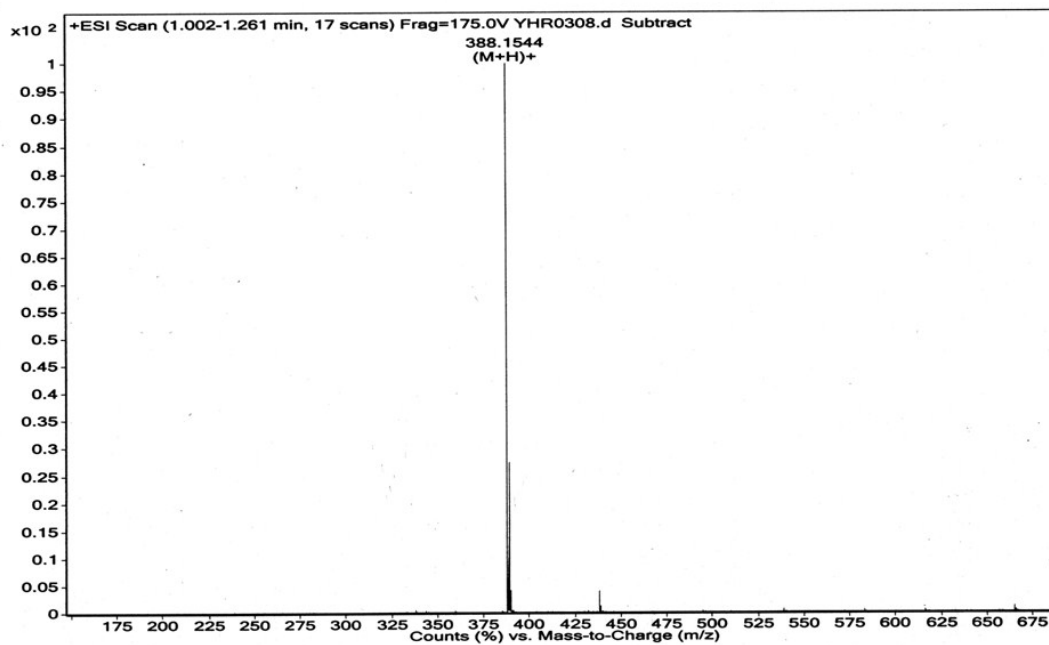

Fig. S14. HRMS (LC/MS) spectra of **1**. The peak at  $m/z = 388.1544$  was assigned to the mass of  $\text{1+H}^+$ .



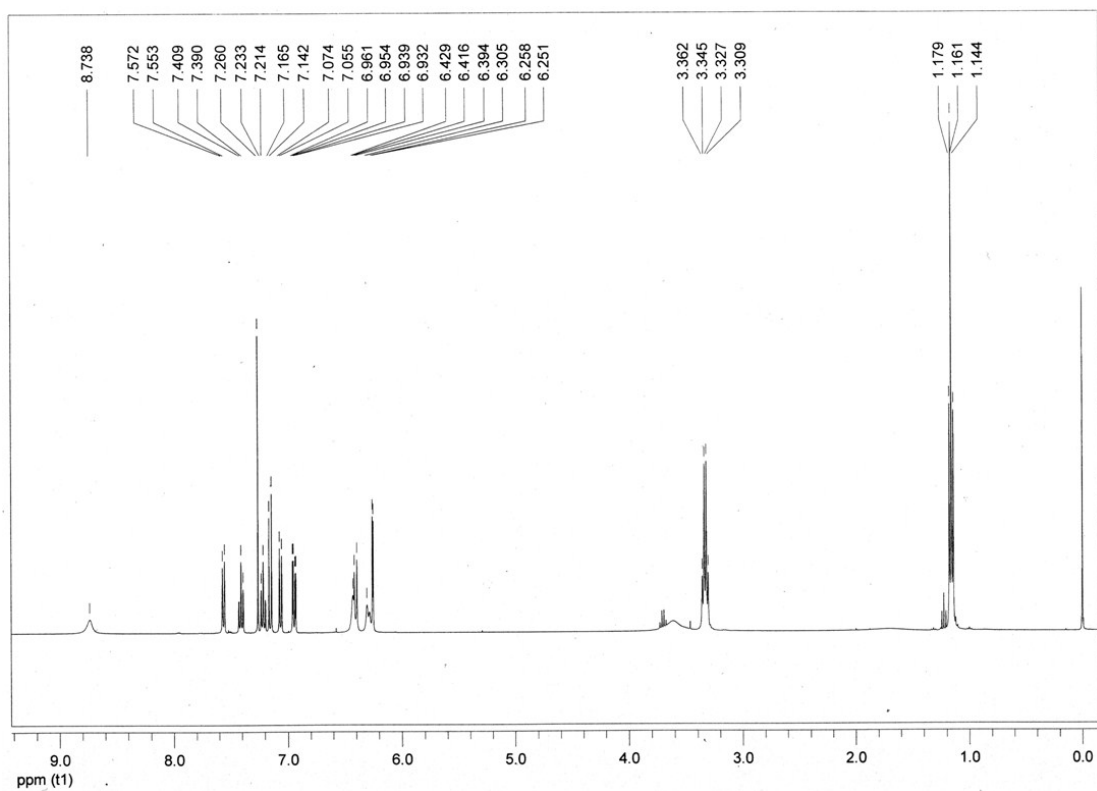

Fig. S15.  $^1\text{H}$  NMR of **2** (400 MHz,  $\text{DMSO-d}_6$ )

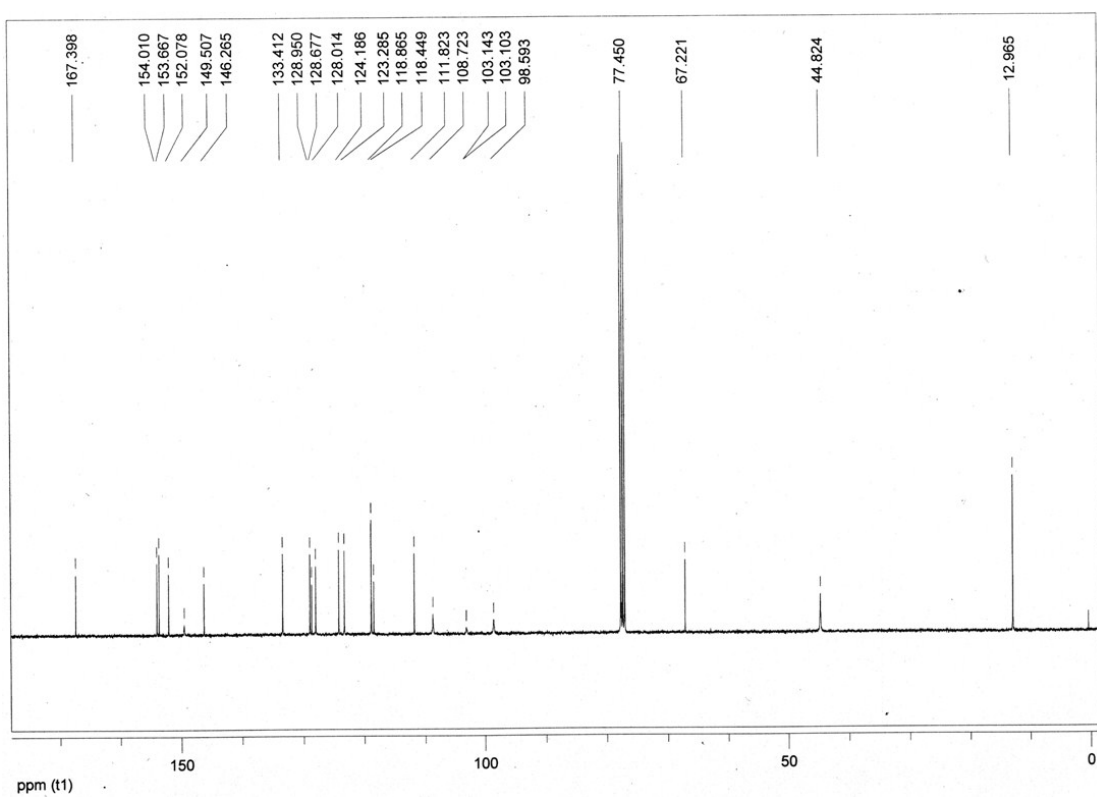

Fig. S16  $^{13}\text{C}$  NMR of **2** (100 MHz,  $\text{DMSO-d}_6$ ).

| Sample Name   | A7         | Position    | P1-A7     | Instrument Name | Instrument 1 | User Name              |                       |
|---------------|------------|-------------|-----------|-----------------|--------------|------------------------|-----------------------|
| Inj Vol       | -1         | InjPosition |           | SampleType      | Sample       | IRM Calibration Status | Some Ions Missed      |
| Data Filename | YHR0308Y.d | ACQ Method  | chen-ms.m | Comment         |              | Acquired Time          | 5/20/2014 10:28:16 AM |

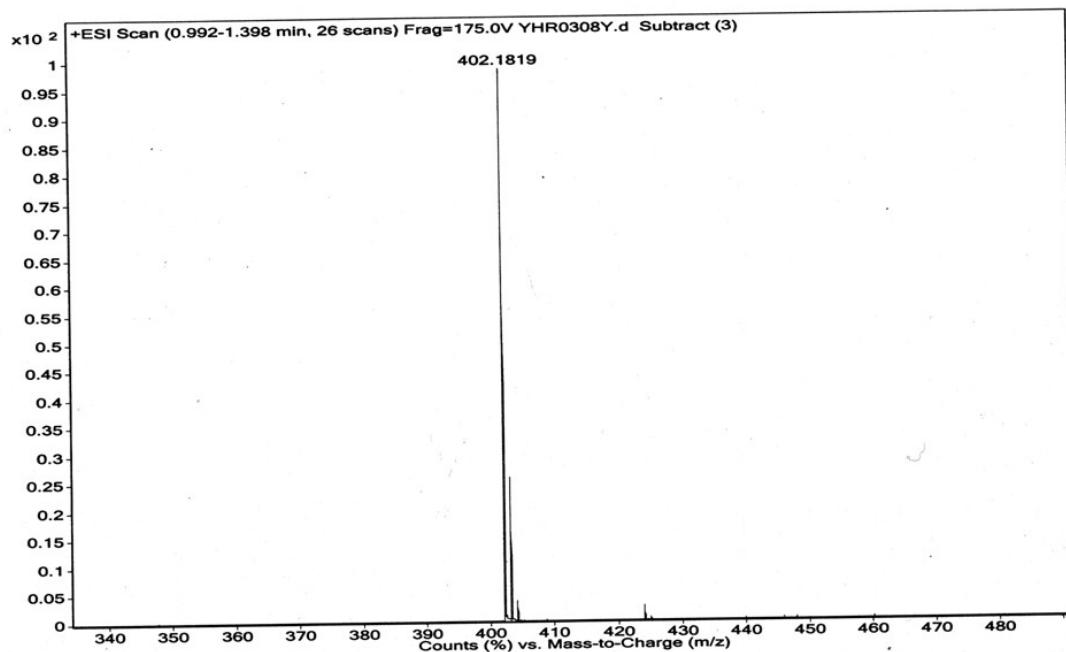

**Fig. S17.** HRMS (LC/MS) spectra of **2**. The peak at  $m/z = 402.1819$  was assigned to the mass of  $2+H^+$ .

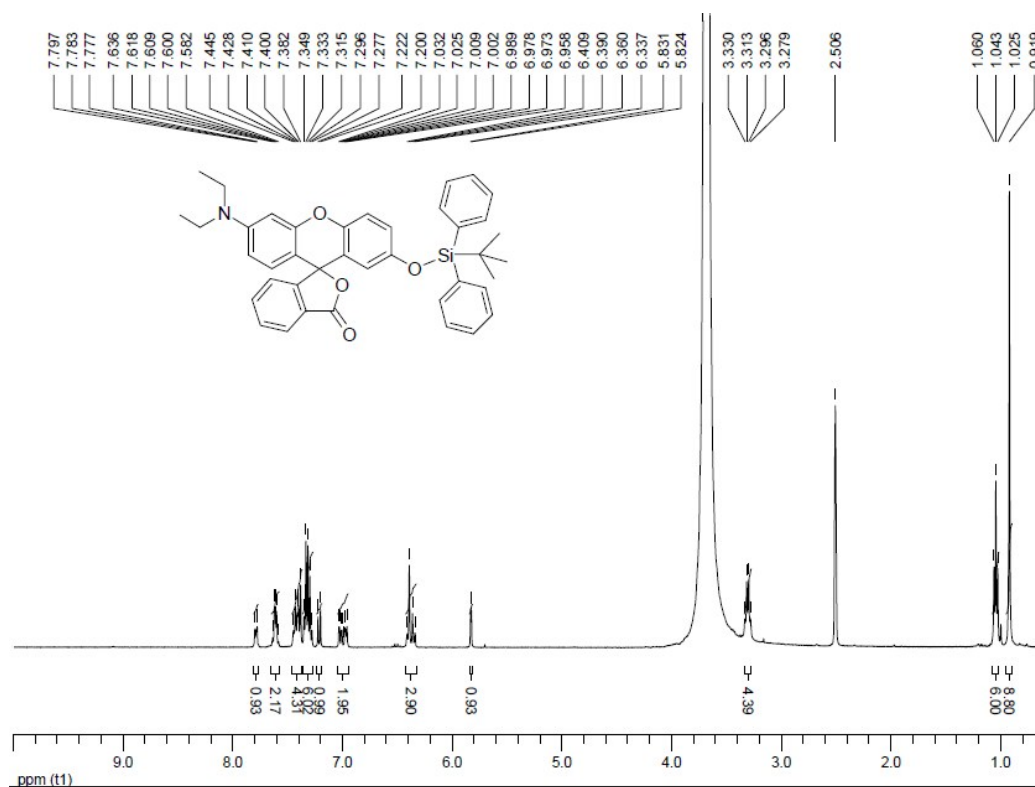

**Fig. S18.**  $^1H$  NMR of **3** (400 MHz,  $DMSO-d_6$ )

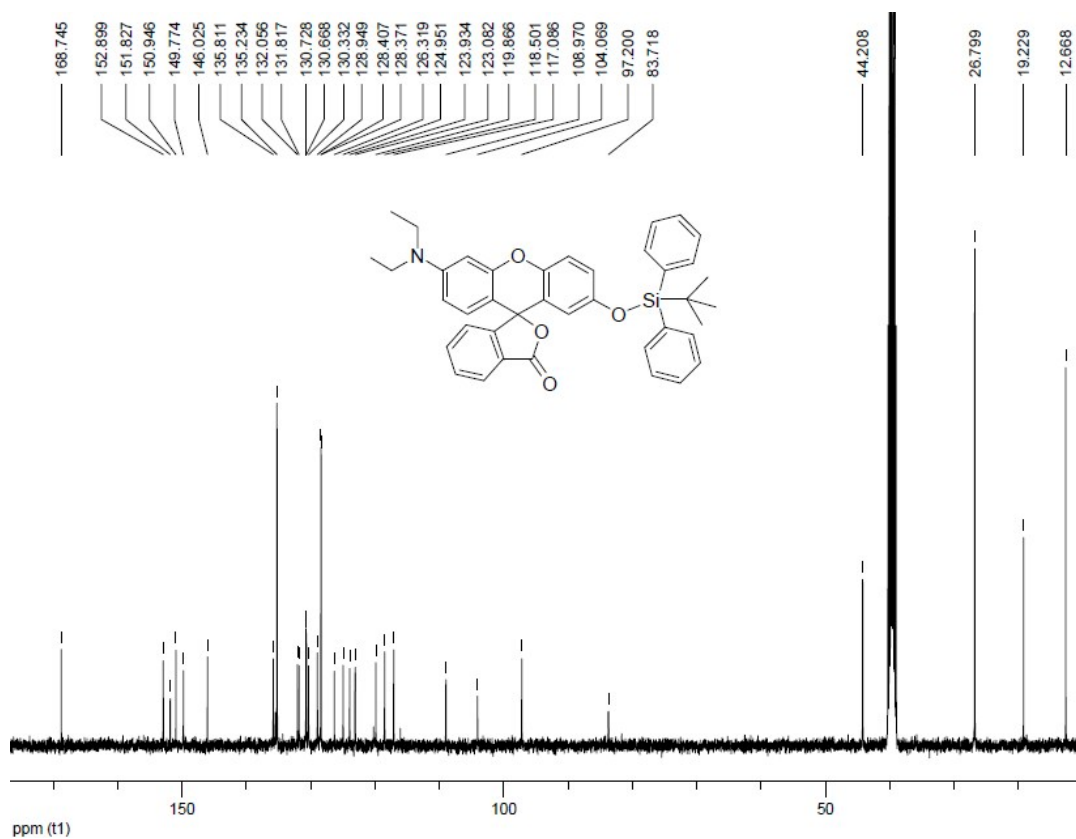

**Fig. S19.**  $^{13}\text{C}$  NMR of **3** (100 MHz,  $\text{DMSO-d}_6$ ).

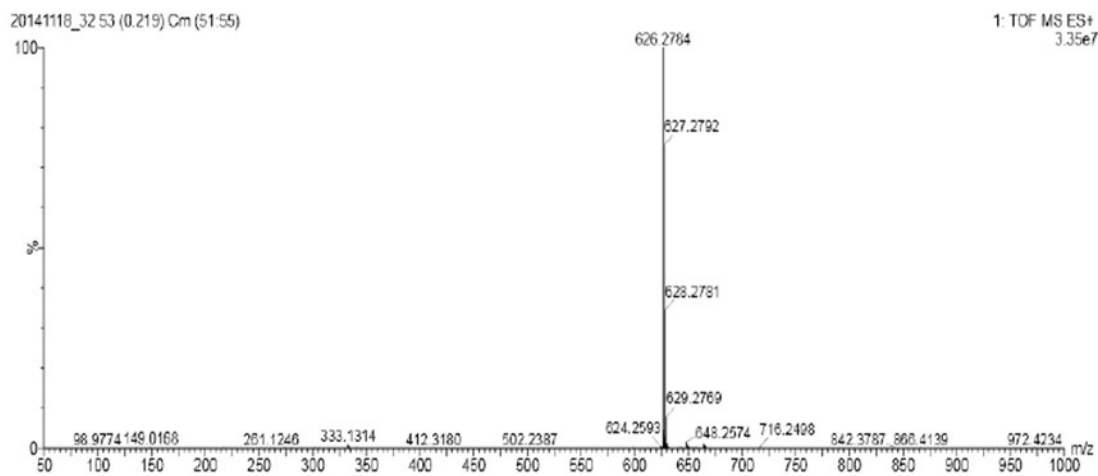

**Fig. S20.** HRMS (LC/MS) spectra of **3**. The peak at  $m/z = 626.28$  was assigned to the mass of  $\mathbf{3} + \text{H}^+$ .
